# Supplementary material
Source: publisher figshare collection journal article supplement (https://sage.figshare.com/ndownloader/files/20187723)
Supplement: Supplementary file 1 [file 20187723]

**Supplement Table 2: Extubation characteristics Summarized by Primary Operation**

| **Procedure** | **Extubated in OR** | **Time (hours) from skin closure to initial extubation among patients NOT extubated in OR*** |
| --- | --- | --- |
| **N (%)** |
| **ASD** | 1,830 (50.2) | 3.7 |
| **N= 3,648** | (1.1, 6.8) |
| **Fontan** | 1,685 (44.0) | 6.9 |
| **N= 3,830** | (3, 18) |
| **VSD** | 1,531 (25.2) | 13.7 |
| **N= 6,066** | (5.8, 25.9) |
| **Glenn/Hemi-Fontan** | 952 (22.9) | 11.4 |
| **N= 4,151** | (4.9, 23.8) |
| **TOF** | 705 (17.1) | 22.3 |
| **N= 4,126** | (10.2, 48.3) |
| **AVC** | 259 (9.1) | 25.2 |
| **N= 2,858** | (16.8, 70.1) |
| **Truncus** | 16 (3.0) | 114.6 |
| **N= 542** | (69.1, 169.1) |
| **ASO** | 47 (2.9) | 67 |
| **N= 1,595** | (40, 108.5) |
| **ASO + VSD** | 15 (2.0) | 81.3 |
| **N= 754** | (44, 137.7) |
| **Norwood** | 23 (0.9) | 141.4 |
| **N= 2,695** | (92.4, 239.7) |
| **Off-Bypass Coarctation** | 870 (17.8) | 23.8 |
| **N= 4,886** | (11.6, 58.1) |
| *Values expressed as percentage or median (Q1, Q3). | |  |
